# Supplementary material for: Less Severe Polymicrobial Sepsis in Conditional mgmt-Deleted Mice Using LysM-Cre System, Impacts of DNA Methylation and MGMT Inhibitor in Sepsis
Source: MDPI journal article supplement (doi:10.3390/ijms241210175), 2023-06-15
Supplement: s1 [file s1]

**Table S1.** The genes responsible for elevated proteins in LPS-activated WT macrophages

| Pasted  | Symbol  | C* | P** | Description                                                                                           |
|---------|---------|----|-----|-------------------------------------------------------------------------------------------------------|
| LMBRD1  | Lmbrd1  | 1  | 25  | LMBR1 domain containing 1 [Source:MGI Symbol;Acc:MGI:1915671]                                         |
| STAT1   | Stat1   | 1  | 52  | signal transducer and activator of transcription 1 [Source:MGI Symbol;Acc:MGI:103063]                 |
| CASP8   | Casp8   | 1  | 59  | caspase 8 [Source:MGI Symbol;Acc:MGI:1261423]                                                         |
| AGFG1   | Agfg1   | 1  | 83  | ArfGAP with FG repeats 1 [Source:MGI Symbol;Acc:MGI:1333754]                                          |
| TRIP12  | Trip12  | 1  | 85  | thyroid hormone receptor interactor 12 [Source:MGI Symbol;Acc:MGI:1309481]                            |
| MNDA    | Ifi211  | 1  | 174 | interferon activated gene 211 [Source:MGI Symbol;Acc:MGI:3041120]                                     |
|         |         |    |     | amyloid beta (A4) precursor protein-binding, family B, member 1 interacting protein [Source:MGI       |
| APBB1IP | Apbb1ip | 2  | 23  | Symbol;Acc:MGI:1861354]                                                                               |
| IL1RN   | Il1rn   | 2  | 24  | interleukin 1 receptor antagonist [Source:MGI Symbol;Acc:MGI:96547]                                   |
| EDF1    | Edf1    | 2  | 25  | endothelial differentiation-related factor 1 [Source:MGI Symbol;Acc:MGI:1891227]                      |
| SEC16A  | Sec16a  | 2  | 26  | SEC16 homolog A, endoplasmic reticulum export factor [Source:MGI Symbol;Acc:MGI:2139207]              |
| TBC1D13 | Tbc1d13 | 2  | 30  | TBC1 domain family, member 13 [Source:MGI Symbol;Acc:MGI:2385326]                                     |
| ASS1    | Ass1    | 2  | 31  | argininosuccinate synthetase 1 [Source:MGI Symbol;Acc:MGI:88090]                                      |
| NMI     | Nmi     | 2  | 52  | N-myc (and STAT) interactor [Source:MGI Symbol;Acc:MGI:1928368]                                       |
| STAM2   | Stam2   | 2  | 53  | signal transducing adaptor molecule (SH3 domain and ITAM motif) 2 [Source:MGI Symbol;Acc:MGI:1929100] |
| GPD2    | Gpd2    | 2  | 57  | glycerol phosphate dehydrogenase 2, mitochondrial [Source:MGI Symbol;Acc:MGI:99778]                   |
| SSB     | Ssb     | 2  | 70  | Sjogren syndrome antigen B [Source:MGI Symbol;Acc:MGI:98423]                                          |
| DYNC1I2 | Dync1i2 | 2  | 71  | dynein cytoplasmic 1 intermediate chain 2 [Source:MGI Symbol;Acc:MGI:107750]                          |
| DNAJC10 | Dnajc10 | 2  | 80  | DnaJ heat shock protein family (Hsp40) member C10 [Source:MGI Symbol;Acc:MGI:1914111]                 |
| CAPRIN1 | Caprin1 | 2  | 104 | cell cycle associated protein 1 [Source:MGI Symbol;Acc:MGI:1858234]                                   |
| B2M     | B2m     | 2  | 122 | beta-2 microglobulin [Source:MGI Symbol;Acc:MGI:88127]                                                |
| IL1B    | Il1b    | 2  | 129 | interleukin 1 beta [Source:MGI Symbol;Acc:MGI:96543]                                                  |
| CHMP4B  | Chmp4b  | 2  | 154 | charged multivesicular body protein 4B [Source:MGI Symbol;Acc:MGI:1922858]                            |

|        |        |   |     |                                                                                                      |
|--------|--------|---|-----|------------------------------------------------------------------------------------------------------|
| AAR2   | Aar2   | 2 | 156 | AAR2 splicing factor homolog [Source:MGI Symbol;Acc:MGI:1915545]                                     |
| CSE1L  | Cse1l  | 2 | 167 | chromosome segregation 1-like (S. cerevisiae) [Source:MGI Symbol;Acc:MGI:1339951]                    |
| CEBPB  | Cebpb  | 2 | 168 | CCAAT/enhancer binding protein (C/EBP), beta [Source:MGI Symbol;Acc:MGI:88373]                       |
| CA13   | Car13  | 3 | 15  | carbonic anhydrase 13 [Source:MGI Symbol;Acc:MGI:1931322]                                            |
| MCL1   | Mcl1   | 3 | 96  | myeloid cell leukemia sequence 1 [Source:MGI Symbol;Acc:MGI:101769]                                  |
| FCGR1  | Fcgr1  | 3 | 96  | Fc receptor, IgG, high affinity I [Source:MGI Symbol;Acc:MGI:95498]                                  |
| MOV10  | Mov10  | 3 | 105 | Mov10 RISC complex RNA helicase [Source:MGI Symbol;Acc:MGI:97054]                                    |
| GNAI3  | Gnai3  | 3 | 108 | guanine nucleotide binding protein (G protein), alpha inhibiting 3 [Source:MGI Symbol;Acc:MGI:95773] |
| GBP5   | Gbp5   | 3 | 142 | guanylate binding protein 5 [Source:MGI Symbol;Acc:MGI:2429943]                                      |
| GBP7   | Gbp7   | 3 | 142 | guanylate binding protein 7 [Source:MGI Symbol;Acc:MGI:2444421]                                      |
| GBP2   | Gbp2   | 3 | 142 | guanylate binding protein 2 [Source:MGI Symbol;Acc:MGI:102772]                                       |
| BCL10  | Bcl10  | 3 | 146 | B cell leukemia/lymphoma 10 [Source:MGI Symbol;Acc:MGI:1337994]                                      |
| DDX58  | Ddx58  | 4 | 40  | DEAD/H box helicase 58 [Source:MGI Symbol;Acc:MGI:2442858]                                           |
| DNAJA1 | Dnaja1 | 4 | 41  | DnaJ heat shock protein family (Hsp40) member A1 [Source:MGI Symbol;Acc:MGI:1270129]                 |
| UBR4   | Ubr4   | 4 | 139 | ubiquitin protein ligase E3 component n-recogin 4 [Source:MGI Symbol;Acc:MGI:1916366]                |
| PRXL2B | Prxl2b | 4 | 155 | peroxiredoxin like 2B [Source:MGI Symbol;Acc:MGI:1913719]                                            |
| NADK   | Nadk   | 4 | 156 | NAD kinase [Source:MGI Symbol;Acc:MGI:2183149]                                                       |
| ABCF2  | Abcf2  | 5 | 25  | ATP-binding cassette, sub-family F (GCN20), member 2 [Source:MGI Symbol;Acc:MGI:1351657]             |
| MRFAP1 | Mrfap1 | 5 | 37  | Morf4 family associated protein 1 [Source:MGI Symbol;Acc:MGI:1914818]                                |
| DHX15  | Dhx15  | 5 | 52  | DEAH (Asp-Glu-Ala-His) box polypeptide 15 [Source:MGI Symbol;Acc:MGI:1099786]                        |
| KCTD8  | Kctd8  | 5 | 69  | potassium channel tetramerisation domain containing 8 [Source:MGI Symbol;Acc:MGI:2443804]            |
| DCK    | Dck    | 5 | 89  | deoxycytidine kinase [Source:MGI Symbol;Acc:MGI:102726]                                              |
| GBP6   | Gbp6   | 5 | 105 | guanylate binding protein 6 [Source:MGI Symbol;Acc:MGI:2140937]                                      |
| RPL5   | Rpl5   | 5 | 108 | ribosomal protein L5 [Source:MGI Symbol;Acc:MGI:102854]                                              |
| GOLGA3 | Golga3 | 5 | 110 | golgi autoantigen, golgin subfamily a, 3 [Source:MGI Symbol;Acc:MGI:96958]                           |
| TPST2  | Tpst2  | 5 | 112 | protein-tyrosine sulfotransferase 2 [Source:MGI Symbol;Acc:MGI:1309516]                              |
| OASL1  | Oasl1  | 5 | 115 | 2'-5' oligoadenylate synthetase-like 1 [Source:MGI Symbol;Acc:MGI:2180849]                           |

|         |         |   |     |                                                                                                 |
|---------|---------|---|-----|-------------------------------------------------------------------------------------------------|
| OAS3    | Oas3    | 5 | 121 | 2'-5' oligoadenylate synthetase 3 [Source:MGI Symbol;Acc:MGI:2180850]                           |
| OAS1A   | Oas1a   | 5 | 121 | 2'-5' oligoadenylate synthetase 1A [Source:MGI Symbol;Acc:MGI:2180860]                          |
| PLOD3   | Plod3   | 5 | 137 | procollagen-lysine, 2-oxoglutarate 5-dioxygenase 3 [Source:MGI Symbol;Acc:MGI:1347008]          |
| COPS6   | Cops6   | 5 | 138 | COP9 signalosome subunit 6 [Source:MGI Symbol;Acc:MGI:1349439]                                  |
| AKR1B1  | Akr1b3  | 6 | 34  | aldo-keto reductase family 1, member B3 (aldose reductase) [Source:MGI Symbol;Acc:MGI:1353494]  |
| MTPN    | Mtpn    | 6 | 35  | myotrophin [Source:MGI Symbol;Acc:MGI:99445]                                                    |
| TBXAS1  | Tbxas1  | 6 | 39  | thromboxane A synthase 1, platelet [Source:MGI Symbol;Acc:MGI:98497]                            |
| NT5C3A  | Nt5c3   | 6 | 57  | 5'-nucleotidase, cytosolic III [Source:MGI Symbol;Acc:MGI:1927186]                              |
| KCMF1   | Kcmf1   | 6 | 73  | potassium channel modulatory factor 1 [Source:MGI Symbol;Acc:MGI:1921537]                       |
| HK2     | Hk2     | 6 | 83  | hexokinase 2 [Source:MGI Symbol;Acc:MGI:1315197]                                                |
| COPG1   | Copg1   | 6 | 88  | coatamer protein complex, subunit gamma 1 [Source:MGI Symbol;Acc:MGI:1858696]                   |
| RASSF4  | Rassf4  | 6 | 117 | Ras association (RalGDS/AF-6) domain family member 4 [Source:MGI Symbol;Acc:MGI:2386853]        |
| BID     | Bid     | 6 | 121 | BH3 interacting domain death agonist [Source:MGI Symbol;Acc:MGI:108093]                         |
| USP18   | Usp18   | 6 | 121 | ubiquitin specific peptidase 18 [Source:MGI Symbol;Acc:MGI:1344364]                             |
| ARHGDIB | Arhgdib | 6 | 137 | Rho, GDP dissociation inhibitor (GDI) beta [Source:MGI Symbol;Acc:MGI:101940]                   |
| NECTIN2 | Nectin2 | 7 | 19  | nectin cell adhesion molecule 2 [Source:MGI Symbol;Acc:MGI:97822]                               |
| GPI     | Gpi1    | 7 | 34  | glucose-6-phosphate isomerase 1 [Source:MGI Symbol;Acc:MGI:95797]                               |
| GYS1    | Gys1    | 7 | 45  | glycogen synthase 1, muscle [Source:MGI Symbol;Acc:MGI:101805]                                  |
| SAA3    | Saa3    | 7 | 46  | serum amyloid A 3 [Source:MGI Symbol;Acc:MGI:98223]                                             |
| MESD    | Mesd    | 7 | 84  | mesoderm development LRP chaperone [Source:MGI Symbol;Acc:MGI:1891421]                          |
| CLNS1A  | Clns1a  | 7 | 97  | chloride channel, nucleotide-sensitive, 1A [Source:MGI Symbol;Acc:MGI:109638]                   |
| TRIM21  | Trim21  | 7 | 102 | tripartite motif-containing 21 [Source:MGI Symbol;Acc:MGI:106657]                               |
| TRIM30A | Trim30a | 7 | 104 | tripartite motif-containing 30A [Source:MGI Symbol;Acc:MGI:98178]                               |
| ITGAL   | Itgal   | 7 | 127 | integrin alpha L [Source:MGI Symbol;Acc:MGI:96606]                                              |
| PSMD13  | Psm13   | 7 | 140 | proteasome (prosome, macropain) 26S subunit, non-ATPase, 13 [Source:MGI Symbol;Acc:MGI:1345192] |
| MSR1    | Msr1    | 8 | 40  | macrophage scavenger receptor 1 [Source:MGI Symbol;Acc:MGI:98257]                               |
| TMA16   | Tma16   | 8 | 67  | translation machinery associated 16 [Source:MGI Symbol;Acc:MGI:1913532]                         |

|          |          |    |     |                                                                                                     |
|----------|----------|----|-----|-----------------------------------------------------------------------------------------------------|
| LRRC25   | Lrrc25   | 8  | 71  | leucine rich repeat containing 25 [Source:MGI Symbol;Acc:MGI:2445284]                               |
| CCDC124  | Ccdc124  | 8  | 71  | coiled-coil domain containing 124 [Source:MGI Symbol;Acc:MGI:1916403]                               |
| BST2     | Bst2     | 8  | 72  | bone marrow stromal cell antigen 2 [Source:MGI Symbol;Acc:MGI:1916800]                              |
| HMOX1    | Hmox1    | 8  | 76  | heme oxygenase 1 [Source:MGI Symbol;Acc:MGI:96163]                                                  |
| TRMT1    | Trmt1    | 8  | 85  | tRNA methyltransferase 1 [Source:MGI Symbol;Acc:MGI:1289155]                                        |
| LPCAT2   | Lpcat2   | 8  | 94  | lysophosphatidylcholine acyltransferase 2 [Source:MGI Symbol;Acc:MGI:3606214]                       |
| PSME3IP1 | Psme3ip1 | 8  | 95  | proteasome activator subunit 3 interacting protein 1 [Source:MGI Symbol;Acc:MGI:1919637]            |
| CIAO2B   | Ciao2b   | 8  | 105 | cytosolic iron-sulfur assembly component 2B [Source:MGI Symbol;Acc:MGI:1915773]                     |
| PSMD7    | Psmd7    | 8  | 108 | proteasome (prosome, macropain) 26S subunit, non-ATPase, 7 [Source:MGI Symbol;Acc:MGI:1351511]      |
| EIF3G    | Eif3g    | 9  | 21  | eukaryotic translation initiation factor 3, subunit G [Source:MGI Symbol;Acc:MGI:1858258]           |
| ICAM1    | Icam1    | 9  | 21  | intercellular adhesion molecule 1 [Source:MGI Symbol;Acc:MGI:96392]                                 |
| ILF3     | Ilf3     | 9  | 21  | interleukin enhancer binding factor 3 [Source:MGI Symbol;Acc:MGI:1339973]                           |
| CBL      | Cbl      | 9  | 44  | Casitas B-lineage lymphoma [Source:MGI Symbol;Acc:MGI:88279]                                        |
| RPS25    | Rps25    | 9  | 44  | ribosomal protein S25 [Source:MGI Symbol;Acc:MGI:1922867]                                           |
| ARCN1    | Arcn1    | 9  | 45  | archain 1 [Source:MGI Symbol;Acc:MGI:2387591]                                                       |
| PML      | Pml      | 9  | 58  | promyelocytic leukemia [Source:MGI Symbol;Acc:MGI:104662]                                           |
| RPLP1    | Rplp1    | 9  | 62  | ribosomal protein, large, P1 [Source:MGI Symbol;Acc:MGI:1927099]                                    |
| ANP32A   | Anp32a   | 9  | 62  | acidic (leucine-rich) nuclear phosphoprotein 32 family, member A [Source:MGI Symbol;Acc:MGI:108447] |
| MAP2K1   | Map2k1   | 9  | 64  | mitogen-activated protein kinase kinase 1 [Source:MGI Symbol;Acc:MGI:1346866]                       |
| COPB2    | Copb2    | 9  | 98  | coatamer protein complex, subunit beta 2 (beta prime) [Source:MGI Symbol;Acc:MGI:1354962]           |
| MANF     | Manf     | 9  | 107 | mesencephalic astrocyte-derived neurotrophic factor [Source:MGI Symbol;Acc:MGI:1922090]             |
| MAP4     | Map4     | 9  | 110 | microtubule-associated protein 4 [Source:MGI Symbol;Acc:MGI:97178]                                  |
| CLASP2   | Clasp2   | 9  | 114 | CLIP associating protein 2 [Source:MGI Symbol;Acc:MGI:1923749]                                      |
| LZTFL1   | Lztfl1   | 9  | 124 | leucine zipper transcription factor-like 1 [Source:MGI Symbol;Acc:MGI:1934860]                      |
| VPS26A   | Vps26a   | 10 | 62  | VPS26 retromer complex component A [Source:MGI Symbol;Acc:MGI:1353654]                              |
| CCDC6    | Ccdc6    | 10 | 70  | coiled-coil domain containing 6 [Source:MGI Symbol;Acc:MGI:1923801]                                 |

|         |          |    |     |                                                                                                        |
|---------|----------|----|-----|--------------------------------------------------------------------------------------------------------|
| PFKL    | Pfkl     | 10 | 78  | phosphofructokinase, liver, B-type [Source:MGI Symbol;Acc:MGI:97547]                                   |
| BSG     | Bsg      | 10 | 80  | basigin [Source:MGI Symbol;Acc:MGI:88208]                                                              |
| RPS15   | Rps15    | 10 | 80  | ribosomal protein S15 [Source:MGI Symbol;Acc:MGI:98117]                                                |
| CPSF6   | Cpsf6    | 10 | 117 | cleavage and polyadenylation specific factor 6 [Source:MGI Symbol;Acc:MGI:1913948]                     |
| STAT2   | Stat2    | 10 | 128 | signal transducer and activator of transcription 2 [Source:MGI Symbol;Acc:MGI:103039]                  |
| DBNL    | Dbnl     | 11 | 6   | drebrin-like [Source:MGI Symbol;Acc:MGI:700006]                                                        |
| PLEK    | Plek     | 11 | 17  | pleckstrin [Source:MGI Symbol;Acc:MGI:1860485]                                                         |
| RAB1A   | Rab1a    | 11 | 20  | RAB1A, member RAS oncogene family [Source:MGI Symbol;Acc:MGI:97842]                                    |
| CCT4    | Cct4     | 11 | 23  | chaperonin containing Tcp1, subunit 4 (delta) [Source:MGI Symbol;Acc:MGI:104689]                       |
| REL     | Rel      | 11 | 24  | reticuloendotheliosis oncogene [Source:MGI Symbol;Acc:MGI:97897]                                       |
| LCP2    | Lcp2     | 11 | 34  | lymphocyte cytosolic protein 2 [Source:MGI Symbol;Acc:MGI:1321402]                                     |
| PSME2   | Psme2b   | 11 | 49  | protease (prosome, macropain) activator subunit 2B [Source:MGI Symbol;Acc:MGI:1341073]                 |
| SQSTM1  | Sqstm1   | 11 | 50  | sequestosome 1 [Source:MGI Symbol;Acc:MGI:107931]                                                      |
| HSPA4   | Hspa4    | 11 | 53  | heat shock protein 4 [Source:MGI Symbol;Acc:MGI:1342292]                                               |
| ZZEF1   | Zzef1    | 11 | 73  | zinc finger, ZZ-type with EF hand domain 1 [Source:MGI Symbol;Acc:MGI:2444286]                         |
| PAFAH1B |          |    |     |                                                                                                        |
| 1       | Pafah1b1 | 11 | 75  | platelet-activating factor acetylhydrolase, isoform 1b, subunit 1 [Source:MGI Symbol;Acc:MGI:109520]   |
| BLMH    | Blmh     | 11 | 77  | bleomycin hydrolase [Source:MGI Symbol;Acc:MGI:1345186]                                                |
| NUFIP2  | Nufip2   | 11 | 78  | nuclear fragile X mental retardation protein interacting protein 2 [Source:MGI Symbol;Acc:MGI:1915814] |
| RPL23A  | Rpl23a   | 11 | 78  | ribosomal protein L23A [Source:MGI Symbol;Acc:MGI:3040672]                                             |
| LGALS9  | Lgals9   | 11 | 79  | lectin, galactose binding, soluble 9 [Source:MGI Symbol;Acc:MGI:109496]                                |
| CRLF3   | Crlf3    | 11 | 80  | cytokine receptor-like factor 3 [Source:MGI Symbol;Acc:MGI:1860086]                                    |
| ZNF207  | Zfp207   | 11 | 80  | zinc finger protein 207 [Source:MGI Symbol;Acc:MGI:1340045]                                            |
| PSMD11  | Psmd11   | 11 | 80  | proteasome (prosome, macropain) 26S subunit, non-ATPase, 11 [Source:MGI Symbol;Acc:MGI:1916327]        |
| PSMD3   | Psmd3    | 11 | 99  | proteasome (prosome, macropain) 26S subunit, non-ATPase, 3 [Source:MGI Symbol;Acc:MGI:98858]           |
| EIF1    | Eif1     | 11 | 100 | eukaryotic translation initiation factor 1 [Source:MGI Symbol;Acc:MGI:105125]                          |
| DHX58   | Dhx58    | 11 | 101 | DEXH (Asp-Glu-X-His) box polypeptide 58 [Source:MGI Symbol;Acc:MGI:1931560]                            |

|          |          |    |     |                                                                                                      |
|----------|----------|----|-----|------------------------------------------------------------------------------------------------------|
| LGALS3BP | Lgals3bp | 11 | 118 | lectin, galactoside-binding, soluble, 3 binding protein [Source:MGI Symbol;Acc:MGI:99554]            |
| NPLOC4   | Nploc4   | 11 | 120 | NPL4 homolog, ubiquitin recognition factor [Source:MGI Symbol;Acc:MGI:2679787]                       |
| CYRIA    | Cyria    | 12 | 12  | CYFIP related Rac1 interactor A [Source:MGI Symbol;Acc:MGI:1261783]                                  |
| NAMPT    | Nampt    | 12 | 33  | nicotinamide phosphoribosyltransferase [Source:MGI Symbol;Acc:MGI:1929865]                           |
| DDX24    | Ddx24    | 12 | 103 | DEAD box helicase 24 [Source:MGI Symbol;Acc:MGI:1351337]                                             |
| EIF5     | Eif5     | 12 | 112 | eukaryotic translation initiation factor 5 [Source:MGI Symbol;Acc:MGI:95309]                         |
| HK3      | Hk3      | 13 | 55  | hexokinase 3 [Source:MGI Symbol;Acc:MGI:2670962]                                                     |
| CAST     | Cast     | 13 | 75  | calpastatin [Source:MGI Symbol;Acc:MGI:1098236]                                                      |
| PSMD6    | Psmd6    | 14 | 8   | proteasome (prosome, macropain) 26S subunit, non-ATPase, 6 [Source:MGI Symbol;Acc:MGI:1913663]       |
| FLNB     | Flnb     | 14 | 15  | filamin, beta [Source:MGI Symbol;Acc:MGI:2446089]                                                    |
| RTRAF    | Rtraf    | 14 | 20  | RNA transcription, translation and transport factor [Source:MGI Symbol;Acc:MGI:1915295]              |
| RPS24    | Rps24    | 14 | 25  | ribosomal protein S24 [Source:MGI Symbol;Acc:MGI:98147]                                              |
| PNP      | Pnp      | 14 | 51  | purine-nucleoside phosphorylase [Source:MGI Symbol;Acc:MGI:97365]                                    |
| ACIN1    | Acin1    | 14 | 55  | apoptotic chromatin condensation inducer 1 [Source:MGI Symbol;Acc:MGI:1891824]                       |
| PSME1    | Psmel    | 14 | 56  | proteasome (prosome, macropain) activator subunit 1 (PA28 alpha) [Source:MGI Symbol;Acc:MGI:1096367] |
| FNDC3A   | Fndc3a   | 14 | 73  | fibronectin type III domain containing 3A [Source:MGI Symbol;Acc:MGI:1196463]                        |
| ACOD1    | Acod1    | 14 | 103 | aconitate decarboxylase 1 [Source:MGI Symbol;Acc:MGI:103206]                                         |
| GSDMD    | Gsdmd    | 15 | 76  | gasdermin D [Source:MGI Symbol;Acc:MGI:1916396]                                                      |
| NCF4     | Ncf4     | 15 | 78  | neutrophil cytosolic factor 4 [Source:MGI Symbol;Acc:MGI:109186]                                     |
| BIN2     | Bin2     | 15 | 101 | bridging integrator 2 [Source:MGI Symbol;Acc:MGI:3611448]                                            |
| ITGA5    | Itga5    | 15 | 103 | integrin alpha 5 (fibronectin receptor alpha) [Source:MGI Symbol;Acc:MGI:96604]                      |
| NCKAP1L  | Nckap1l  | 15 | 103 | NCK associated protein 1 like [Source:MGI Symbol;Acc:MGI:1926063]                                    |
| GSPT1    | Gspt1    | 16 | 11  | G1 to S phase transition 1 [Source:MGI Symbol;Acc:MGI:1316728]                                       |
| DNAJB11  | Dnajb11  | 16 | 23  | DnaJ heat shock protein family (Hsp40) member B11 [Source:MGI Symbol;Acc:MGI:1915088]                |
| HCLS1    | Hcls1    | 16 | 37  | hematopoietic cell specific Lyn substrate 1 [Source:MGI Symbol;Acc:MGI:104568]                       |
| COX17    | Cox17    | 16 | 38  | cytochrome c oxidase assembly protein 17, copper chaperone [Source:MGI Symbol;Acc:MGI:1333806]       |

|         |         |    |    |                                                                                               |
|---------|---------|----|----|-----------------------------------------------------------------------------------------------|
| FILIP1L | Filip1l | 16 | 57 | filamin A interacting protein 1-like [Source:MGI Symbol;Acc:MGI:1925999]                      |
| CLCN7   | Clcn7   | 17 | 25 | chloride channel, voltage-sensitive 7 [Source:MGI Symbol;Acc:MGI:1347048]                     |
| RPL10A  | Rpl10a  | 17 | 29 | ribosomal protein L10A [Source:MGI Symbol;Acc:MGI:1343877]                                    |
| RPS28   | Rps28   | 17 | 34 | ribosomal protein S28 [Source:MGI Symbol;Acc:MGI:1859516]                                     |
| H2-K1   | H2-K1   | 17 | 34 | histocompatibility 2, K1, K region [Source:MGI Symbol;Acc:MGI:95904]                          |
| TAP1    | Tap1    | 17 | 34 | transporter 1, ATP-binding cassette, sub-family B (MDR/TAP) [Source:MGI Symbol;Acc:MGI:98483] |
| TAP2    | Tap2    | 17 | 34 | transporter 2, ATP-binding cassette, sub-family B (MDR/TAP) [Source:MGI Symbol;Acc:MGI:98484] |

#### Hsp90ab

|          |         |    |    |                                                                                               |
|----------|---------|----|----|-----------------------------------------------------------------------------------------------|
| HSP90AB1 | 1       | 17 | 46 | heat shock protein 90 alpha (cytosolic), class B member 1 [Source:MGI Symbol;Acc:MGI:96247]   |
| XPO5     | Xpo5    | 17 | 47 | exportin 5 [Source:MGI Symbol;Acc:MGI:1913789]                                                |
| GTF2F1   | Gtf2f1  | 17 | 57 | general transcription factor IIF, polypeptide 1 [Source:MGI Symbol;Acc:MGI:1923848]           |
| C3       | C3      | 17 | 58 | complement component 3 [Source:MGI Symbol;Acc:MGI:88227]                                      |
| EIF2AK2  | Eif2ak2 | 17 | 79 | eukaryotic translation initiation factor 2-alpha kinase 2 [Source:MGI Symbol;Acc:MGI:1353449] |
| MAPRE2   | Mapre2  | 18 | 24 | microtubule-associated protein, RP/EB family, member 2 [Source:MGI Symbol;Acc:MGI:106271]     |
| PFDN1    | Pfdn1   | 18 | 37 | prefoldin 1 [Source:MGI Symbol;Acc:MGI:1914449]                                               |
| EIF1A    | Eif1a   | 18 | 47 | eukaryotic translation initiation factor 1A [Source:MGI Symbol;Acc:MGI:95298]                 |
| MALT1    | Malt1   | 18 | 66 | MALT1 paracaspase [Source:MGI Symbol;Acc:MGI:2445027]                                         |
| GSTP1    | Gstp1   | 19 | 4  | glutathione S-transferase, pi 1 [Source:MGI Symbol;Acc:MGI:95865]                             |
| SSH3     | Ssh3    | 19 | 4  | slingshot protein phosphatase 3 [Source:MGI Symbol;Acc:MGI:2683546]                           |
| FRMD8    | Frmd8   | 19 | 6  | FERM domain containing 8 [Source:MGI Symbol;Acc:MGI:1914707]                                  |
| ZFPL1    | Zfpl1   | 19 | 6  | zinc finger like protein 1 [Source:MGI Symbol;Acc:MGI:1891017]                                |
| EHD1     | Ehd1    | 19 | 6  | EH-domain containing 1 [Source:MGI Symbol;Acc:MGI:1341878]                                    |
| PRDX5    | Prdx5   | 19 | 7  | peroxiredoxin 5 [Source:MGI Symbol;Acc:MGI:1859821]                                           |
| MS4A6B   | Ms4a6b  | 19 | 11 | membrane-spanning 4-domains, subfamily A, member 6B [Source:MGI Symbol;Acc:MGI:1917024]       |
| OSBP     | Osbp    | 19 | 12 | oxysterol binding protein [Source:MGI Symbol;Acc:MGI:97447]                                   |
| DOCK8    | Dock8   | 19 | 25 | dedicator of cytokinesis 8 [Source:MGI Symbol;Acc:MGI:1921396]                                |

|        |       |    |     |                                                                                                                    |
|--------|-------|----|-----|--------------------------------------------------------------------------------------------------------------------|
| IFIT2  | Ifit2 | 19 | 35  | interferon-induced protein with tetratricopeptide repeats 2 [Source:MGI Symbol;Acc:MGI:99449]                      |
| IFIT3  | Ifit3 | 19 | 35  | interferon-induced protein with tetratricopeptide repeats 3 [Source:MGI Symbol;Acc:MGI:1101055]                    |
| IFIT1  | Ifit1 | 19 | 35  | interferon-induced protein with tetratricopeptide repeats 1 [Source:MGI Symbol;Acc:MGI:99450]                      |
| NFKB2  | Nfkb2 | 19 | 46  | nuclear factor of kappa light polypeptide gene enhancer in B cells 2, p49/p100 [Source:MGI Symbol;Acc:MGI:1099800] |
| VTI1A  | Vti1a | 19 | 55  | vesicle transport through interaction with t-SNAREs 1A [Source:MGI Symbol;Acc:MGI:1855699]                         |
| IGBP1  | Igbp1 | X  | 100 | immunoglobulin (CD79A) binding protein 1 [Source:MGI Symbol;Acc:MGI:1346500]                                       |
| PSMD10 | Psm10 | X  | 140 | proteasome (prosome, macropain) 26S subunit, non-ATPase, 10 [Source:MGI Symbol;Acc:MGI:1858898]                    |

\* Chromosome; \*\*, Position (Mbp)

**Table S2.** The genes responsible for decreased proteins in LPS-activated WT macrophages

| Pasted  | Symbol  | C* | P** | Description                                                                       |
|---------|---------|----|-----|-----------------------------------------------------------------------------------|
| RPL7    | Rpl7    | 1  | 16  | ribosomal protein L7 [Source:MGI Symbol;Acc:MGI:98073]                            |
| COX5B   | Cox5b   | 1  | 37  | cytochrome c oxidase subunit 5B [Source:MGI Symbol;Acc:MGI:88475]                 |
| HSPD1   | Hspd1   | 1  | 55  | heat shock protein 1 (chaperonin) [Source:MGI Symbol;Acc:MGI:96242]               |
| DES     | Des     | 1  | 75  | desmin [Source:MGI Symbol;Acc:MGI:94885]                                          |
| NDUFA10 | Ndufa10 | 1  | 92  | NADH:ubiquinone oxidoreductase subunit A10 [Source:MGI Symbol;Acc:MGI:1914523]    |
| CDK18   | Cdk18   | 1  | 132 | cyclin-dependent kinase 18 [Source:MGI Symbol;Acc:MGI:97518]                      |
| SNRPE   | Snrpe   | 1  | 134 | small nuclear ribonucleoprotein E [Source:MGI Symbol;Acc:MGI:98346]               |
| GLUL    | Glul    | 1  | 154 | glutamate-ammonia ligase (glutamine synthetase) [Source:MGI Symbol;Acc:MGI:95739] |
| FH      | Fh1     | 1  | 175 | fumarate hydratase 1 [Source:MGI Symbol;Acc:MGI:95530]                            |
| CAT     | Cat     | 2  | 103 | catalase [Source:MGI Symbol;Acc:MGI:88271]                                        |
| IVD     | Ivd     | 2  | 119 | isovaleryl coenzyme A dehydrogenase [Source:MGI Symbol;Acc:MGI:1929242]           |
| GALK2   | Galk2   | 2  | 126 | galactokinase 2 [Source:MGI Symbol;Acc:MGI:1917226]                               |
| CST3    | Cst3    | 2  | 149 | cystatin C [Source:MGI Symbol;Acc:MGI:102519]                                     |
| EPB41L1 | Epb41l1 | 2  | 156 | erythrocyte membrane protein band 4.1 like 1 [Source:MGI Symbol;Acc:MGI:103010]   |



|         |         |   |     |                                                                                                                               |
|---------|---------|---|-----|-------------------------------------------------------------------------------------------------------------------------------|
| RAE1    | Rae1    | 2 | 173 | ribonucleic acid export 1 [Source:MGI Symbol;Acc:MGI:1913929]                                                                 |
| RNF13   | Rnf13   | 3 | 58  | ring finger protein 13 [Source:MGI Symbol;Acc:MGI:1346341]                                                                    |
| PLEKHO1 | Plekho1 | 3 | 96  | pleckstrin homology domain containing, family O member 1 [Source:MGI Symbol;Acc:MGI:1914470]                                  |
| CHIL3   | Chil3   | 3 | 106 | chitinase-like 3 [Source:MGI Symbol;Acc:MGI:1330860]                                                                          |
| GCLM    | Gclm    | 3 | 122 | glutamate-cysteine ligase, modifier subunit [Source:MGI Symbol;Acc:MGI:104995]                                                |
| CAMK2D  | Camk2d  | 3 | 126 | calcium/calmodulin-dependent protein kinase II, delta [Source:MGI Symbol;Acc:MGI:1341265]                                     |
| RPL34   | Rpl34   | 3 | 131 | ribosomal protein L34 [Source:MGI Symbol;Acc:MGI:1915686]                                                                     |
| DECR1   | Decr1   | 4 | 16  | 2,4-dienoyl CoA reductase 1, mitochondrial [Source:MGI Symbol;Acc:MGI:1914710]                                                |
| STOML2  | Stoml2  | 4 | 43  | stomatin (Epb7.2)-like 2 [Source:MGI Symbol;Acc:MGI:1913842]                                                                  |
| HINT2   | Hint2   | 4 | 44  | histidine triad nucleotide binding protein 2 [Source:MGI Symbol;Acc:MGI:1916167]                                              |
| PRDX1   | Prdx1   | 4 | 117 | peroxiredoxin 1 [Source:MGI Symbol;Acc:MGI:99523]                                                                             |
| HMGCL   | Hmgcl   | 4 | 136 | 3-hydroxy-3-methylglutaryl-Coenzyme A lyase [Source:MGI Symbol;Acc:MGI:96158]                                                 |
| C1QC    | C1qc    | 4 | 137 | complement component 1, q subcomponent, C chain [Source:MGI Symbol;Acc:MGI:88225]                                             |
| CD36    | Cd36    | 5 | 18  | CD36 molecule [Source:MGI Symbol;Acc:MGI:107899]                                                                              |
| HADHA   | Hadha   | 5 | 30  | hydroxyacyl-CoA dehydrogenase trifunctional multienzyme complex subunit alpha [Source:MGI Symbol;Acc:MGI:2135593]             |
| HADHB   | Hadhb   | 5 | 30  | hydroxyacyl-CoA dehydrogenase trifunctional multienzyme complex subunit beta [Source:MGI Symbol;Acc:MGI:2136381]              |
| MAN2B2  | Man2b2  | 5 | 37  | mannosidase 2, alpha B2 [Source:MGI Symbol;Acc:MGI:1195262]                                                                   |
| COMMD8  | Commd8  | 5 | 72  | COMM domain containing 8 [Source:MGI Symbol;Acc:MGI:1343485]                                                                  |
|         |         |   |     | phosphoribosylaminoimidazole carboxylase, phosphoribosylaminoribosylaminoimidazole, succinocarboxamide synthetase [Source:MGI |
| PAICS   | Paics   | 5 | 77  | Symbol;Acc:MGI:1914304]                                                                                                       |
| STAP1   | Stap1   | 5 | 86  | signal transducing adaptor family member 1 [Source:MGI Symbol;Acc:MGI:1926193]                                                |
| ANXA3   | Anxa3   | 5 | 97  | annexin A3 [Source:MGI Symbol;Acc:MGI:1201378]                                                                                |
| IDUA    | Idua    | 5 | 109 | iduronidase, alpha-L [Source:MGI Symbol;Acc:MGI:96418]                                                                        |
| HSCB    | Hscb    | 5 | 111 | HscB iron-sulfur cluster co-chaperone [Source:MGI Symbol;Acc:MGI:2141135]                                                     |
| ALDH2   | Aldh2   | 5 | 122 | aldehyde dehydrogenase 2, mitochondrial [Source:MGI Symbol;Acc:MGI:99600]                                                     |
| NDUFA4  | Ndufa4  | 6 | 12  | Ndufa4, mitochondrial complex associated [Source:MGI Symbol;Acc:MGI:107686]                                                   |
| AKR1B8  | Akr1b8  | 6 | 34  | aldo-keto reductase family 1, member B8 [Source:MGI Symbol;Acc:MGI:107673]                                                    |

|          |          |   |     |                                                                                                                           |
|----------|----------|---|-----|---------------------------------------------------------------------------------------------------------------------------|
| ATP6V1E1 | Atp6v1e1 | 6 | 121 | ATPase, H <sup>+</sup> transporting, lysosomal V1 subunit E1 [Source:MGI Symbol;Acc:MGI:894326]                           |
| PPFIBP1  | Ppfibp1  | 6 | 147 | PTPRF interacting protein, binding protein 1 (liprin beta 1) [Source:MGI Symbol;Acc:MGI:1914783]                          |
| SAE1     | Sae1     | 7 | 16  | SUMO1 activating enzyme subunit 1 [Source:MGI Symbol;Acc:MGI:1929264]                                                     |
| CKM      | Ckm      | 7 | 19  | creatine kinase, muscle [Source:MGI Symbol;Acc:MGI:88413]                                                                 |
| BLOC1S3  | Bloc1s3  | 7 | 19  | biogenesis of lysosomal organelles complex-1, subunit 3 [Source:MGI Symbol;Acc:MGI:2678952]                               |
| APOE     | Apoe     | 7 | 19  | apolipoprotein E [Source:MGI Symbol;Acc:MGI:88057]                                                                        |
| BLVRB    | Blvrbl   | 7 | 27  | biliverdin reductase B (flavin reductase (NADPH)) [Source:MGI Symbol;Acc:MGI:2385271]                                     |
| PLD3     | Pld3     | 7 | 27  | phospholipase D family, member 3 [Source:MGI Symbol;Acc:MGI:1333782]                                                      |
| ETFB     | Etfb     | 7 | 43  | electron transferring flavoprotein, beta polypeptide [Source:MGI Symbol;Acc:MGI:106098]                                   |
| NUCB1    | Nucb1    | 7 | 45  | nucleobindin 1 [Source:MGI Symbol;Acc:MGI:97388]                                                                          |
| BCAT2    | Bcat2    | 7 | 45  | branched chain aminotransferase 2, mitochondrial [Source:MGI Symbol;Acc:MGI:1276534]                                      |
| IDH2     | Idh2     | 7 | 80  | isocitrate dehydrogenase 2 (NADP <sup>+</sup> ), mitochondrial [Source:MGI Symbol;Acc:MGI:96414]                          |
| FOLR2    | Folr2    | 7 | 101 | folate receptor 2 (fetal) [Source:MGI Symbol;Acc:MGI:95569]                                                               |
| LAMTOR1  | Lamtor1  | 7 | 102 | late endosomal/lysosomal adaptor, MAPK and MTOR activator 1 [Source:MGI Symbol;Acc:MGI:1913758]                           |
| TUFM     | Tufm     | 7 | 126 | Tu translation elongation factor, mitochondrial [Source:MGI Symbol;Acc:MGI:1923686]                                       |
| PYCARD   | Pycard   | 7 | 128 | PYD and CARD domain containing [Source:MGI Symbol;Acc:MGI:1931465]                                                        |
| ADAM8    | Adam8    | 7 | 140 | a disintegrin and metallopeptidase domain 8 [Source:MGI Symbol;Acc:MGI:107825]                                            |
| GSR      | Gsr      | 8 | 34  | glutathione reductase [Source:MGI Symbol;Acc:MGI:95804]                                                                   |
| LPL      | Lpl      | 8 | 69  | lipoprotein lipase [Source:MGI Symbol;Acc:MGI:96820]                                                                      |
| PGLS     | Pgls     | 8 | 72  | 6-phosphogluconolactonase [Source:MGI Symbol;Acc:MGI:1913421]                                                             |
| CBFB     | Cbfb     | 8 | 106 | core binding factor beta [Source:MGI Symbol;Acc:MGI:99851]                                                                |
| DPEP2    | Dpep2    | 8 | 107 | dipeptidase 2 [Source:MGI Symbol;Acc:MGI:2442042]                                                                         |
| APRT     | Aprt     | 8 | 123 | adenine phosphoribosyl transferase [Source:MGI Symbol;Acc:MGI:88061]                                                      |
| UBL5     | Ubl5     | 9 | 21  | ubiquitin-like 5 [Source:MGI Symbol;Acc:MGI:1913427]                                                                      |
| DLAT     | Dlat     | 9 | 51  | dihydrolipoamide S-acetyltransferase (E2 component of pyruvate dehydrogenase complex) [Source:MGI Symbol;Acc:MGI:2385311] |
| ACAT1    | Acat1    | 9 | 53  | acetyl-Coenzyme A acetyltransferase 1 [Source:MGI Symbol;Acc:MGI:87870]                                                   |

|          |          |    |     |                                                                                                                                |
|----------|----------|----|-----|--------------------------------------------------------------------------------------------------------------------------------|
| IDH3A    | Idh3a    | 9  | 54  | isocitrate dehydrogenase 3 (NAD+) alpha [Source:MGI Symbol;Acc:MGI:1915084]                                                    |
| ETFA     | Etfa     | 9  | 55  | electron transferring flavoprotein, alpha polypeptide [Source:MGI Symbol;Acc:MGI:106092]                                       |
| HEXA     | Hexa     | 9  | 59  | hexosaminidase A [Source:MGI Symbol;Acc:MGI:96073]                                                                             |
| CAMKV    | Camkv    | 9  | 108 | CaM kinase-like vesicle-associated [Source:MGI Symbol;Acc:MGI:2384296]                                                         |
| ARHGAP18 | Arhgap18 | 10 | 27  | Rho GTPase activating protein 18 [Source:MGI Symbol;Acc:MGI:1921160]                                                           |
| PDXK     | Pdxk     | 10 | 78  | pyridoxal (pyridoxine, vitamin B6) kinase [Source:MGI Symbol;Acc:MGI:1351869]                                                  |
| ATP5F1D  | Atp5d    | 10 | 80  | ATP synthase, H+ transporting, mitochondrial F1 complex, delta subunit [Source:MGI Symbol;Acc:MGI:1913293]                     |
| GNS      | Gns      | 10 | 121 | glucosamine (N-acetyl)-6-sulfatase [Source:MGI Symbol;Acc:MGI:1922862]                                                         |
| ATP5F1B  | Atp5b    | 10 | 128 | ATP synthase, H+ transporting mitochondrial F1 complex, beta subunit [Source:MGI Symbol;Acc:MGI:107801]                        |
| OGDH     | Ogdh     | 11 | 6   | oxoglutarate (alpha-ketoglutarate) dehydrogenase (lipoamide) [Source:MGI Symbol;Acc:MGI:1098267]                               |
| UQCRCQ   | Uqcrq    | 11 | 53  | ubiquinol-cytochrome c reductase, complex III subunit VII [Source:MGI Symbol;Acc:MGI:107807]                                   |
| PDLIM4   | Pdlim4   | 11 | 54  | PDZ and LIM domain 4 [Source:MGI Symbol;Acc:MGI:1353470]                                                                       |
| ACADVL   | Acadvl   | 11 | 70  | acyl-Coenzyme A dehydrogenase, very long chain [Source:MGI Symbol;Acc:MGI:895149]                                              |
| YWHAE    | Ywhae    | 11 | 76  | tyrosine 3-monooxygenase/tryptophan 5-monooxygenase activation protein, epsilon polypeptide [Source:MGI Symbol;Acc:MGI:894689] |
| CCL9     | Ccl9     | 11 | 83  | chemokine (C-C motif) ligand 9 [Source:MGI Symbol;Acc:MGI:104533]                                                              |
| SCPEP1   | Scpep1   | 11 | 89  | serine carboxypeptidase 1 [Source:MGI Symbol;Acc:MGI:1921867]                                                                  |
| RPL38    | Rpl38    | 11 | 115 | ribosomal protein L38 [Source:MGI Symbol;Acc:MGI:1914921]                                                                      |
| CD300LD3 | Cd300ld3 | 11 | 115 | CD300 molecule like family member D3 [Source:MGI Symbol;Acc:MGI:2687214]                                                       |
| ATP5PD   | Atp5h    | 11 | 115 | ATP synthase, H+ transporting, mitochondrial F0 complex, subunit D [Source:MGI Symbol;Acc:MGI:1918929]                         |
| RAB10    | Rab10    | 12 | 3   | RAB10, member RAS oncogene family [Source:MGI Symbol;Acc:MGI:105066]                                                           |
| RPL36A   | Rpl36a   | 12 | 69  | ribosomal protein L36A-like [Source:MGI Symbol;Acc:MGI:1913733]                                                                |
| RIOX1    | Riox1    | 12 | 84  | ribosomal oxygenase 1 [Source:MGI Symbol;Acc:MGI:1919202]                                                                      |
| CDC42BPB | Cdc42bpb | 12 | 111 | CDC42 binding protein kinase beta [Source:MGI Symbol;Acc:MGI:2136459]                                                          |
| AKR1C13  | Akr1c13  | 13 | 4   | aldo-keto reductase family 1, member C13 [Source:MGI Symbol;Acc:MGI:1351662]                                                   |

|         |         |    |     |                                                                                                                       |
|---------|---------|----|-----|-----------------------------------------------------------------------------------------------------------------------|
| GMD5    | Gmd5    | 13 | 32  | GDP-mannose 4, 6-dehydratase [Source:MGI Symbol;Acc:MGI:1891112]                                                      |
| UQCRB   | Uqcrb   | 13 | 67  | ubiquinol-cytochrome c reductase binding protein [Source:MGI Symbol;Acc:MGI:1914780]                                  |
| GFM2    | Gfm2    | 13 | 97  | G elongation factor, mitochondrial 2 [Source:MGI Symbol;Acc:MGI:2444783]                                              |
| MCCC2   | Mccc2   | 13 | 100 | methylcrotonoyl-Coenzyme A carboxylase 2 (beta) [Source:MGI Symbol;Acc:MGI:1925288]                                   |
| STAB1   | Stab1   | 14 | 31  | stabilin 1 [Source:MGI Symbol;Acc:MGI:2178742]                                                                        |
| LGALS3  | Lgals3  | 14 | 48  | lectin, galactose binding, soluble 3 [Source:MGI Symbol;Acc:MGI:96778]                                                |
| CCAR2   | Ccar2   | 14 | 70  | cell cycle activator and apoptosis regulator 2 [Source:MGI Symbol;Acc:MGI:2444228]                                    |
| DOK2    | Dok2    | 14 | 71  | docking protein 2 [Source:MGI Symbol;Acc:MGI:1332623]                                                                 |
| DAB2    | Dab2    | 15 | 6   | disabled 2, mitogen-responsive phosphoprotein [Source:MGI Symbol;Acc:MGI:109175]                                      |
| MTSS1   | Mtss1   | 15 | 59  | MTSS I-BAR domain containing 1 [Source:MGI Symbol;Acc:MGI:2384818]                                                    |
| EXOSC4  | Exosc4  | 15 | 76  | exosome component 4 [Source:MGI Symbol;Acc:MGI:1923576]                                                               |
| ACO2    | Aco2    | 15 | 82  | aconitase 2, mitochondrial [Source:MGI Symbol;Acc:MGI:87880]                                                          |
| RPL35A  | Rpl35a  | 16 | 33  | ribosomal protein L35A [Source:MGI Symbol;Acc:MGI:1928894]                                                            |
| ATP5PF  | Atp5j   | 16 | 85  | ATP synthase, H <sup>+</sup> transporting, mitochondrial F0 complex, subunit F [Source:MGI Symbol;Acc:MGI:107777]     |
| ATP5PO  | Atp5o   | 16 | 92  | ATP synthase, H <sup>+</sup> transporting, mitochondrial F1 complex, O subunit [Source:MGI Symbol;Acc:MGI:106341]     |
| NDUFB10 | Ndufb10 | 17 | 25  | NADH:ubiquinone oxidoreductase subunit B10 [Source:MGI Symbol;Acc:MGI:1915592]                                        |
| HNRNPM  | Hnrnrm  | 17 | 34  | heterogeneous nuclear ribonucleoprotein M [Source:MGI Symbol;Acc:MGI:1926465]                                         |
| KLC4    | Klc4    | 17 | 47  | kinesin light chain 4 [Source:MGI Symbol;Acc:MGI:1922014]                                                             |
| COMMD10 | Commd10 | 18 | 47  | COMM domain containing 10 [Source:MGI Symbol;Acc:MGI:1916706]                                                         |
| ACAA2   | Acaa2   | 18 | 75  | acetyl-Coenzyme A acyltransferase 2 (mitochondrial 3-oxoacyl-Coenzyme A thiolase) [Source:MGI Symbol;Acc:MGI:1098623] |
| NDUFS8  | Ndufs8  | 19 | 4   | NADH:ubiquinone oxidoreductase core subunit S8 [Source:MGI Symbol;Acc:MGI:2385079]                                    |
| RBM14   | Rbm14   | 19 | 5   | RNA binding motif protein 14 [Source:MGI Symbol;Acc:MGI:1929092]                                                      |
| MPEG1   | Mpeg1   | 19 | 12  | macrophage expressed gene 1 [Source:MGI Symbol;Acc:MGI:1333743]                                                       |
| ANXA1   | Anxa1   | 19 | 20  | annexin A1 [Source:MGI Symbol;Acc:MGI:96819]                                                                          |
| LIPA    | Lipa    | 19 | 34  | lysosomal acid lipase A [Source:MGI Symbol;Acc:MGI:96789]                                                             |
| PRDX3   | Prdx3   | 19 | 61  | peroxiredoxin 3 [Source:MGI Symbol;Acc:MGI:88034]                                                                     |

|       |       |   |     |                                                             |
|-------|-------|---|-----|-------------------------------------------------------------|
| ACOT9 | Acot9 | X | 154 | acyl-CoA thioesterase 9 [Source:MGI Symbol;Acc:MGI:1928939] |
|-------|-------|---|-----|-------------------------------------------------------------|

---

\*, Chromosome; \*\*, Position (Mbp)
